# Supplementary material for: The COVID-19 Infodemic on Twitter: A Space and Time Topic Analysis of the Brazilian Immunization Program and Public Trust
Source: MDPI journal article supplement (doi:10.3390/tropicalmed7120425), 2022-12-09
Supplement: s1 [file s1]

## Supplementary Materials

### Tables

**Table S1.** Parameters used in the scraping script.

| Type of parameter       | Details                                                                                                                                                                                                                                                                                                                                                                                                                                                                                                                                                                                                             |
|-------------------------|---------------------------------------------------------------------------------------------------------------------------------------------------------------------------------------------------------------------------------------------------------------------------------------------------------------------------------------------------------------------------------------------------------------------------------------------------------------------------------------------------------------------------------------------------------------------------------------------------------------------|
| Keywords                | 1 <sup>st</sup> block, COVID/pandemic related terms with hashtags: <i>#covid</i> , <i>#covid-19</i> , <i>#covid19</i> , <i>#covid_19</i> , <i>#coronavírus</i> , <i>#pandemia covid</i> .                                                                                                                                                                                                                                                                                                                                                                                                                           |
|                         | 2 <sup>nd</sup> block, COVID/pandemic related terms without hashtags: <i>covid</i> , <i>covid-19</i> , <i>covid19</i> , <i>covid_19</i> , <i>coronavirus</i> , <i>pandemia</i> .                                                                                                                                                                                                                                                                                                                                                                                                                                    |
|                         | 3 <sup>rd</sup> block, COVID vaccination related terms with hashtags: <i>#vacina</i> , <i>#vacinacao</i> , <i>#vacinacovid-19</i> , <i>#vacina_corona</i> , <i>#vacina_covid</i> , <i>#vacina_covid-19</i> , <i>#vacina_covid_19</i> , <i>#vacina_coronavirus</i> , <i>#vacina_covid19</i> , <i>#vacinacaocorona</i> , <i>#vacinacaocovid-19</i> , <i>#vacinacaocovid_19</i> , <i>#vacinacaocoronavirus</i> , <i>#vacinacao_corona</i> , <i>#vacinacaocovid19</i> , <i>#vacinacao_covid</i> , <i>#vacinacao_coronavirus</i> , <i>#vacinacao_covid19</i> , <i>#vacinacao_covid-19</i> , <i>#vacinacao_covid_19</i> . |
|                         | 4 <sup>th</sup> block, COVID vaccination related free terms: <i>vacina</i> , <i>vacinacao</i> , <i>vacinar</i> , <i>vacinado</i> .                                                                                                                                                                                                                                                                                                                                                                                                                                                                                  |
| Geographical constraint | <i>place_country:BR</i> , to retrieve only tweets from Brazil                                                                                                                                                                                                                                                                                                                                                                                                                                                                                                                                                       |
| Language constraint     | <i>lang:pt</i> , to retrieve only tweets in Portuguese                                                                                                                                                                                                                                                                                                                                                                                                                                                                                                                                                              |

**Table S2.** Example of the georeferenced corpus, containing the first five rows.

|   | text <sup>1</sup>                                          | place_name              | country | latitude <sup>2</sup> | longitude <sup>2</sup> | created_at                   |
|---|------------------------------------------------------------|-------------------------|---------|-----------------------|------------------------|------------------------------|
| 0 | Vacina cubana<br>'Soberana', contra<br>covid-19, ter...    | Rio de<br>Janeiro       | Brasil  | -<br>22.906847        | -43.172897             | 2020-12-31<br>23:47:35+00:00 |
| 1 | #CORONAVÍRUS:<br>Em reunião com<br>TCE-AM,<br>@Amazonas... | Manaus                  | Brasil  | -3.119028             | -60.021731             | 2020-12-31<br>23:47:08+00:00 |
| 2 | Vou virar o ano<br>isolado até da<br>própria família...    | Natal                   | Brasil  | -5.784169             | -35.199971             | 2020-12-31<br>23:16:48+00:00 |
| 3 | @jose_simao Mas o<br>problema não é o<br>covid...e s...    | São Paulo               | Brasil  | -<br>23.555771        | -46.639557             | 2020-12-31<br>23:10:50+00:00 |
| 4 | Tomara que chova<br>no Brasil inteiro pra<br>não ter...    | Santa Isabel<br>do Ivaí | Brasil  | -<br>23.001704        | -53.196903             | 2020-12-31<br>22:52:18+00:00 |

<sup>1</sup> The texts were left truncated in the table for spacing reasons, however, the texts used in the process were the complete versions.

<sup>2</sup> The geographic coordinate point was subdivided into two columns, one for latitude and one for longitude.

**Table S3.** Cities with at least 300 tweets retrieved.

| City*          | Count | City*         | Count |
|----------------|-------|---------------|-------|
| São Paulo      | 451   | Goiânia       | 338   |
| Rio de Janeiro | 430   | Macapá        | 332   |
| Salvador       | 361   | Campinas      | 331   |
| Brasília       | 360   | Florianópolis | 330   |
| Belo Horizonte | 356   | João Pessoa   | 323   |
| Belém          | 352   | Natal         | 323   |
| Curitiba       | 351   | Teresina      | 319   |
| Recife         | 345   | Aracaju       | 318   |
| Niterói        | 345   | Maceió        | 310   |
| Porto Alegre   | 344   | Santos        | 303   |
| São Luís       | 343   | Vitória       | 303   |
| Fortaleza      | 342   | Uberlândia    | 300   |
| Manaus         | 341   |               |       |

\* Cities highlighted in grey are Brazilian states' capitals.

**Table S4.** The 23 topics extracted using LDA algorithm.

|                 | Term 1        | Term 2      | Term 3       | Term 4      | Term 5        | Term 6     | Term 7            | Term 8             | Term 9                | Term 10      | Term 11      | Term 12       | Term 13   | Term 14      | Term 15     |
|-----------------|---------------|-------------|--------------|-------------|---------------|------------|-------------------|--------------------|-----------------------|--------------|--------------|---------------|-----------|--------------|-------------|
| <b>Topic 1</b>  | vacinacao     | populacao   | vacinada     | inicio      | saude         | governo    | ficar             | vacinassalvamvidas | grupos                | morrer       | publica      | pandemia      | absurdo   | amigos       | auxilio     |
| <b>Topic 2</b>  | idosos        | imunizacao  | vida         | publico     | calendario    | pandemia   | compra            | diariamente        | fato                  | infelizmente | rua          | medico        | vacina    | negacionismo | bdsp        |
| <b>Topic 3</b>  | vacinacao     | sus         | plano        | governo     | semana        | países     | genocida          | país               | receber               | prefeito     | segue        | covid         | ritmo     | prioritario  | caos        |
| <b>Topic 4</b>  | vacina        | ano         | pandemia     | mae         | existe        | covid      | pessoas           | importante         | tratamento            | vida         | outro        | direito       | vacinando | virus        | espero      |
| <b>Topic 5</b>  | anos          | hoje        | vacina       | feira       | profissionais | covid      | bolsonaro         | amanha             | frente                | uso          | coronavac    | comeca        | comprar   | processo     | coronavirus |
| <b>Topic 6</b>  | dia           | nacional    | governador   | sabado      | data          | horas      | vacinaparatodosja | rapido             | dizendo               | fico         | milhares     | sucesso       | daqui     | carteirinha  | seguir      |
| <b>Topic 7</b>  | mortes        | vacina      | feliz        | esperanca   | hoje          | seja       | quase             | comecar            | trabalho              | cartao       | covid        | deveria       | pandemia  | dinheiro     | gratidao    |
| <b>Topic 8</b>  | dose          | vivaosus    | vacina       | vacinado    | vemvacina     | covid      | dias              | vacinacaocovid     | forabolsonarogenocida | melhor       | vivaaciencia | atencao       | passar    | brasileira   | luta        |
| <b>Topic 9</b>  | vacinacao     | vacinar     | presidente   | comecou     | ministro      | governo    | carteira          | pessoas            | combate               | país         | cpi          | aulas         | podemos   | filhos       | hospitais   |
| <b>Topic 10</b> | vacinaja      | saude       | precisa      | casos       | gripe         | fosse      | vacina            | levar              | aplicacao             | obrigatoria  | secretaria   | trabalhadores | veio      | acao         | medicos     |
| <b>Topic 11</b> | vacinaparatos | vacina      | coronavirus  | campanha    | vou           | paulo      | covid             | via                | pessoas               | acho         | fica         | continuar     | porra     | site         | imunidade   |
| <b>Topic 12</b> | fila          | vacina      | familia      | covid       | sair          | tomando    | etc               | entrar             | doria                 | dor          | junto        | igual         | vida      | pandemia     | festa       |
| <b>Topic 13</b> | vacinasim     | vacina      | tomar        | covid       | gente         | casa       | alguem            | hora               | vidas                 | prioridade   | braco        | fala          | mim       | tomei        | medo        |
| <b>Topic 14</b> | forabolsonaro | pessoas     | vacina       | país        | virus         | pandemia   | brasileiro        | durante            | unica                 | finalmente   | tivesse      | mundo         | criancas  | tomaram      | impeachment |
| <b>Topic 15</b> | viva          | chegou      | noticia      | pandemia    | vacina        | gracas     | pior              | mundo              | normal                | voltar       | esperar      | situacao      | deixa     | urgente      | errado      |
| <b>Topic 16</b> | deus          | vacina      | covid        | janeiro     | brasil        | parabens   | pessoal           | estados            | amor                  | seguranca    | olha         | senhor        | esperando | hospital     | filho       |
| <b>Topic 17</b> | vacinas       | doses       | vacina       | ciencia     | federal       | idade      | covid             | eficacia           | acabar                | vacinou      | morrendo     | domingo       | causa     | centro       | tava        |
| <b>Topic 18</b> | mascara       | vacinados   | rio          | pandemia    | prefeitura    | pfizer     | distanciamento    | caso               | social                | precisamos   | cloroquina   | triste        | mascaras  | isolamento   | informacoes |
| <b>Topic 19</b> | vacinacao     | vamos       | saude        | brasil      | pessoa        | ministerio | doenca            | foto               | politica              | covid        | fase         | butantan      | acima     | testes       | vacina      |
| <b>Topic 20</b> | vacina        | covid       | tomou        | cara        | queria        | tomar      | galera            | toma               | postos                | comprovante  | joao         | municipal     | ubs       | enfim        | municipio   |
| <b>Topic 21</b> | pandemia      | pai         | fazendo      | vacina      | conta         | acabou     | posto             | risco              | comorbidades          | continua     | culpa        | merda         | mundial   | linha        | dados       |
| <b>Topic 22</b> | vacinacao     | milhoes     | massa        | usemascaras | brasileiros   | chegar     | falar             | educacao           | chega                 | morte        | populacao    | astrazeneca   | recebeu   | marco        | materia     |
| <b>Topic 23</b> | cidade        | vacinacovid | adolescentes | faixa       | medidas       | etaria     | governadores      | loais              | politicos             | informacao   | prefeitos    | setembro      | juntos    | maio         | inicia      |

Table S5. The 23 topics terms translations (or approximated translations) to English.

|          | Term 1             | Term 2                                                                              | Term 3      | Term 4      | Term 5            | Term 6                                        | Term 7                                                                 | Term 8                                                                                   | Term 9                         | Term 10       | Term 11                                                              | Term 12     | Term 13                                                      | Term 14     | Term 15                                                   |
|----------|--------------------|-------------------------------------------------------------------------------------|-------------|-------------|-------------------|-----------------------------------------------|------------------------------------------------------------------------|------------------------------------------------------------------------------------------|--------------------------------|---------------|----------------------------------------------------------------------|-------------|--------------------------------------------------------------|-------------|-----------------------------------------------------------|
| Topic 1  | vaccination        | people                                                                              | vaccinated  | start       | health            | government                                    | to stay                                                                | vaccinessavellives                                                                       | groups                         | to die        | public                                                               | pandemic    | absurd                                                       | friends     | aid                                                       |
| Topic 2  | elderly people     | immunization                                                                        | life        | public      | calendar          | pandemic                                      | purchase                                                               | daily                                                                                    | fact                           | unfortunately | street                                                               | doctor      | vaccine                                                      | negationism | bdsp<br>(Portuguese acronym for "good morning São Paulo") |
| Topic 3  | vaccination        | sus<br>(Portuguese acronym for "Brazilian Public Health System")                    | plan        | government  | week              | countries                                     | genocidal                                                              | country                                                                                  | to receive                     | mayor         | follow                                                               | covid       | rhythm                                                       | priority    | chaos                                                     |
| Topic 4  | vaccine            | year                                                                                | pandemic    | mother      | exists            | covid                                         | people<br>Bolsonaro (a family name related to the Brazilian president) | important                                                                                | treatment                      | life          | other                                                                | right       | vaccinating                                                  | virus       | [I] expect                                                |
| Topic 5  | years              | today                                                                               | vaccine     | fair/market | professionals     | covid                                         | vaccineforeverbodynow                                                  | tomorrow                                                                                 | front                          | usage         | coronavac                                                            | begins      | purchase                                                     | process     | coronavirus                                               |
| Topic 6  | day                | national                                                                            | governor    | saturday    | date              | hours                                         | fast                                                                   | saying                                                                                   | [I] stay                       | thousands     | success                                                              | from here   | little card                                                  | follow      |                                                           |
| Topic 7  | deaths             | vaccine<br>hailthesus<br>(something like "Hail the Brazilian Public Health System") | happy       | hope        | today             | be                                            | almost                                                                 | to start                                                                                 | job                            | card          | covid                                                                | should      | pandemic                                                     | money       | gratitude                                                 |
| Topic 8  | shot               |                                                                                     | vaccine     | vaccinated  | comevaccine       | covid                                         | days                                                                   | covidvaccination                                                                         | outgenocidalbolsonaro          | best          | longlivesciencie                                                     | warning     | to pass                                                      | brazilian   | fight                                                     |
| Topic 9  | vaccination        | to vaccinate                                                                        | president   | started     | minister          | government                                    | card                                                                   | people                                                                                   | combat                         | country       | cpi<br>(Portuguese acronym for "Parliamentary Committee of Inquiry") | classes     | [we] can                                                     | children    | hospitals                                                 |
| Topic 10 | vaccinenow         | health                                                                              | need        | cases       | the flu           | were                                          | vaccine                                                                | to take                                                                                  | application                    | mandatorily   | secretariat                                                          | workers     | came                                                         | action      | doctors                                                   |
| Topic 11 | vaccineforeverbody | vaccine                                                                             | coronavirus | campaign    | I will/I am going | paulo (the proper name "Paul", in Portuguese) | covid                                                                  | via (it can be translated as "way", or as a conjugation of the verb "to see" like "saw") | people                         | [I] think     | stay                                                                 | to continue | porra (it is a popular low-slang interjection in Portuguese) | site        | immunity                                                  |
| Topic 12 | queue              | vaccine                                                                             | family      | covid       | to leave          | taking                                        | etc                                                                    | enter                                                                                    | doria (João Doria, a Brazilian | pain          | together                                                             | equal       | life                                                         | pandemic    | party                                                     |

|          |              |              |                                                                                       |                                                                           |            |                 |                                                                                     |            |                                                                                     |                      |                                             |                                                                                   |                                                  |             |                  |
|----------|--------------|--------------|---------------------------------------------------------------------------------------|---------------------------------------------------------------------------|------------|-----------------|-------------------------------------------------------------------------------------|------------|-------------------------------------------------------------------------------------|----------------------|---------------------------------------------|-----------------------------------------------------------------------------------|--------------------------------------------------|-------------|------------------|
|          |              |              |                                                                                       |                                                                           |            |                 |                                                                                     |            | businessman and politician)                                                         |                      |                                             |                                                                                   |                                                  |             |                  |
| Topic 13 | vaccinees    | vaccine      | to take                                                                               | covid                                                                     | people     | house           | somebody/someone/anybody                                                            | hour       | lives                                                                               | priority             | arm                                         | speech                                                                            | me/myself                                        | [I] took    | fear             |
| Topic 14 | outbolsonaro | people       | vaccine                                                                               | country                                                                   | virus      | pandemic        | brazilian                                                                           | during     | only                                                                                | finally to come back | had                                         | world                                                                             | children                                         | [they] took | impeachment      |
| Topic 15 | hail         | has arrived  | news                                                                                  | pandemic                                                                  | vaccine    | thanks          | worst                                                                               | world      | regular                                                                             |                      | to wait                                     | situation                                                                         | leaves                                           | urgent      | wrong            |
| Topic 16 | god          | vaccine      | covid                                                                                 | january                                                                   | brazil     | congratulations | personnel                                                                           | states     | love                                                                                | security             | look                                        | mister                                                                            | waiting                                          | hospital    | son              |
| Topic 17 | vaccines     | shots        | vaccine                                                                               | science                                                                   | federal    | age             | covid                                                                               | efficiency | to finish                                                                           | vaccinated           | dying                                       | sunday                                                                            | cause                                            | center      | was              |
| Topic 18 | mask         | vaccinated   | rio (it can mean "river" in Portuguese, or can refer to the city of "Rio de Janeiro") | pandemic                                                                  | town hall  | pfizer          | distancing                                                                          | case       | social                                                                              | [we] need            | chloroquine                                 | sad                                                                               | masks                                            | isolation   | information      |
| Topic 19 | vaccination  | [we] will    | health                                                                                | brazil                                                                    | person     | ministry        | disease                                                                             | picture    | policy                                                                              | covid                | stage/phase                                 | butantan (referring to the Butantan Institute, which produces vaccines in Brazil) | above                                            | tests       | vaccine          |
| Topic 20 | vaccine      | covid        | took                                                                                  | cara (in colloquial usage it can mean "guy", but it can also mean "face") | [I] wanted | to take         | crowd                                                                               | take       | [health] centers (referring to the "health centers" where the vaccines are applied) | certificate          | joao (the proper name "John" in Portuguese) | municipal                                                                         | ubs (Portuguese acronym for "basic health unit") | anyway      | municipality     |
| Topic 21 | pandemic     | father       | making/doing                                                                          | vaccine                                                                   | account    | ended           | [health] centers (referring to the "health centers" where the vaccines are applied) | risk       | comorbidities                                                                       | continue             | fault                                       | merda (it is a popular low-slang interjection in Portuguese)                      | worldwide                                        | line        | data             |
| Topic 22 | vaccination  | millions     | mass                                                                                  | usemask                                                                   | brazilian  | to arrive       | to speak                                                                            | education  | It can mean "enough!" (an interjection) or "[he] arrives"                           | death                | population                                  | astrazeneca                                                                       | received                                         | milestone   | matter/substance |
| Topic 23 | city         | covidvaccine | teenagers/adolescents                                                                 | range                                                                     | measures   | age             | governors                                                                           | places     | politicians                                                                         | information          | mayors                                      | september                                                                         | together                                         | may         | starts           |

**Table S6.** Possible interpretations for each topic.

| Topic | Interpretation                                                                                                                                        | Topic | Interpretation                                                                                                                    |
|-------|-------------------------------------------------------------------------------------------------------------------------------------------------------|-------|-----------------------------------------------------------------------------------------------------------------------------------|
| 1     | Start of vaccination for the population by the government to contain the pandemic                                                                     | 13    | Vaccine saving lives concerning COVID-19                                                                                          |
| 2     | Immunization for elderly people                                                                                                                       | 14    | Vaccination against COVID-19 and potential impeachment of the president of Brazil                                                 |
| 3     | Vaccination as a priority government action to combat COVID-19                                                                                        | 15    | Arrival of vaccines to bring normality concerning the terrible situation generated by the pandemic                                |
| 4     | Vaccination as a right of the people to fight COVID-19                                                                                                | 16    | Brazilian states vaccinating against COVID-19 from January*                                                                       |
| 5     | Beginning of the process of purchasing vaccines against COVID-19 by the Brazilian government                                                          | 17    | Questioning the effectiveness of vaccines against COVID-19, associating them with the deaths of people who took vaccines shots    |
| 6     | National vaccination campaign serving thousands of people                                                                                             | 18    | Criticism of isolation measures and vaccination with mention of the use of medication without proven efficacy against the disease |
| 7     | Vaccines bringing hope for reducing the number of deaths in the pandemic                                                                              | 19    | Call for vaccination against COVID-19, with tested and approved vaccines in Brazil                                                |
| 8     | Support to the Brazilian Public Health Service (SUS) and vaccination                                                                                  | 20    | People go to health centers to be vaccinated and receive the cards that prove the vaccination                                     |
| 9     | Vaccination process started, with the action of politicians, seeking to fight the disease to promote the return to school and the relief of hospitals | 21    | Vaccines are being produced worldwide to combat the pandemic and considering the risks associated with comorbidities              |
| 10    | Mandatory vaccination for workers considering cases of flu                                                                                            | 22    | Support for vaccination against COVID-19, the use of masks, and the education of Brazilians to prevent deaths                     |
| 11    | COVID-19 vaccination campaign to ensure immunity for all people                                                                                       | 23    | Start of vaccination of the adolescent public age groups                                                                          |
| 12    | People facing queues to get the COVID-19 vaccine                                                                                                      |       |                                                                                                                                   |

\*The first COVID-19 vaccine was applied in Brazil on January 17, 2021

**Table S7.** Tweets amounts according to each topic.

| <b>Topic</b> | <b>Tweets<br/>Amount</b> | <b>Topic</b> | <b>Tweets<br/>Amount</b> |
|--------------|--------------------------|--------------|--------------------------|
| 1            | 3,970                    | 13           | 4,815                    |
| 2            | 1,867                    | 14           | 1,836                    |
| 3            | 7,165                    | 15           | 1,127                    |
| 4            | 3,295                    | 16           | 1,359                    |
| 5            | 3,095                    | 17           | 1,803                    |
| 6            | 1,075                    | 18           | 1,297                    |
| 7            | 1,872                    | 19           | 2,387                    |
| 8            | 3,804                    | 20           | 3,415                    |
| 9            | 3,196                    | 21           | 948                      |
| 10           | 1,515                    | 22           | 1,728                    |
| 11           | 2,380                    | 23           | 744                      |
| 12           | 1,065                    | Total        | 55,758                   |



## Figures

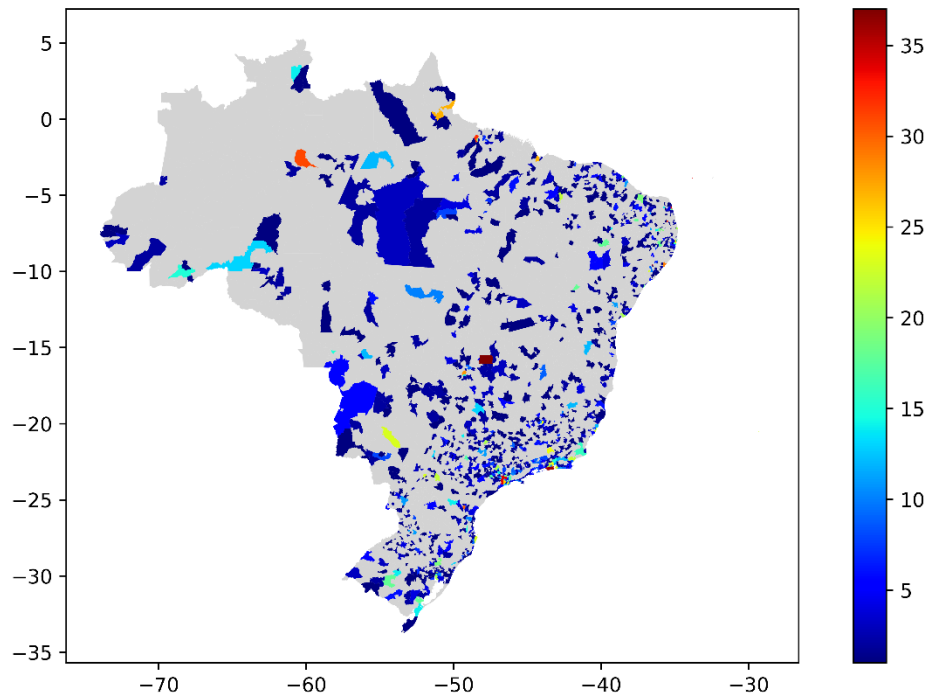

**Figure S1.** Topic 1 distribution on the Brazilian territory.

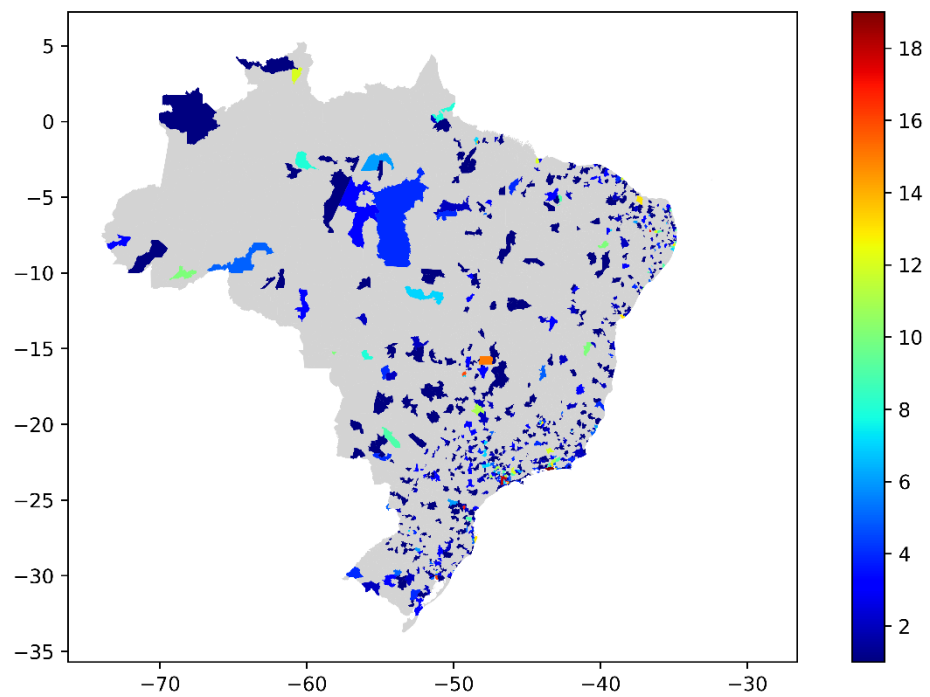

**Figure S2.** Topic 2 distribution on the Brazilian territory.

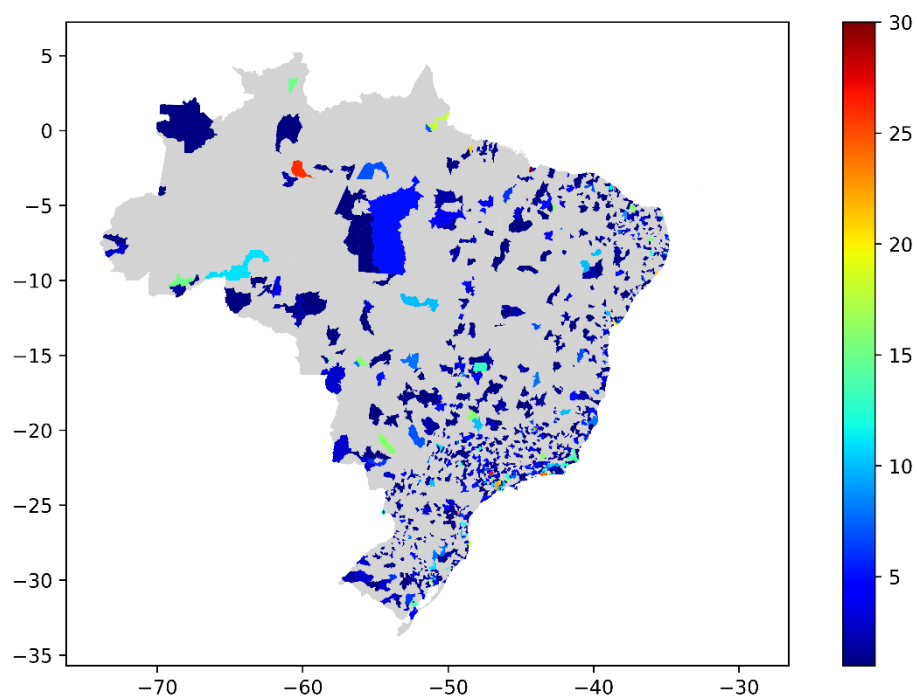

**Figure S3.** Topic 4 distribution on the Brazilian territory.

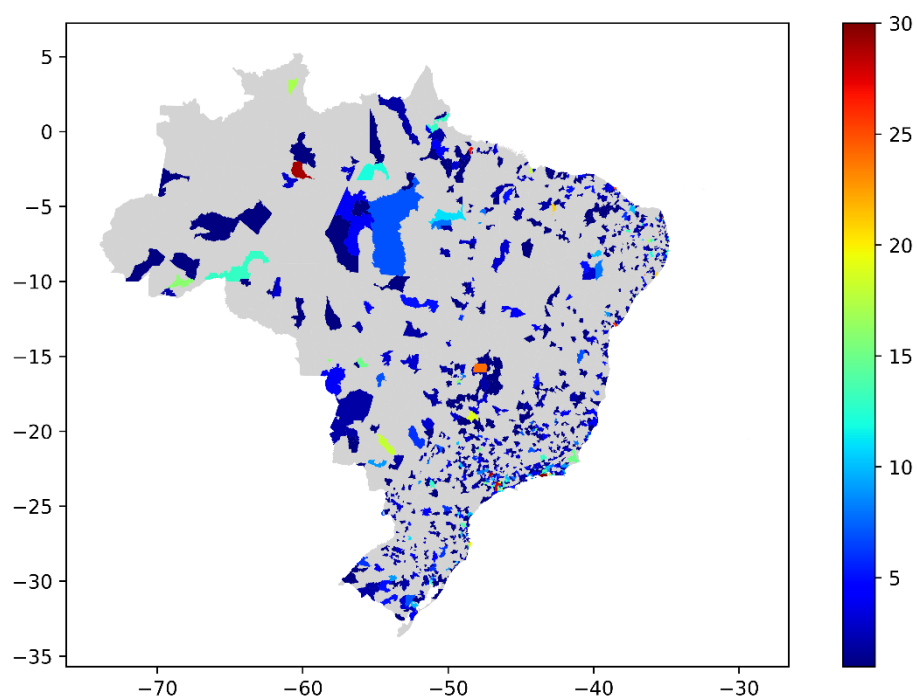

**Figure S4.** Topic 5 distribution on the Brazilian territory.

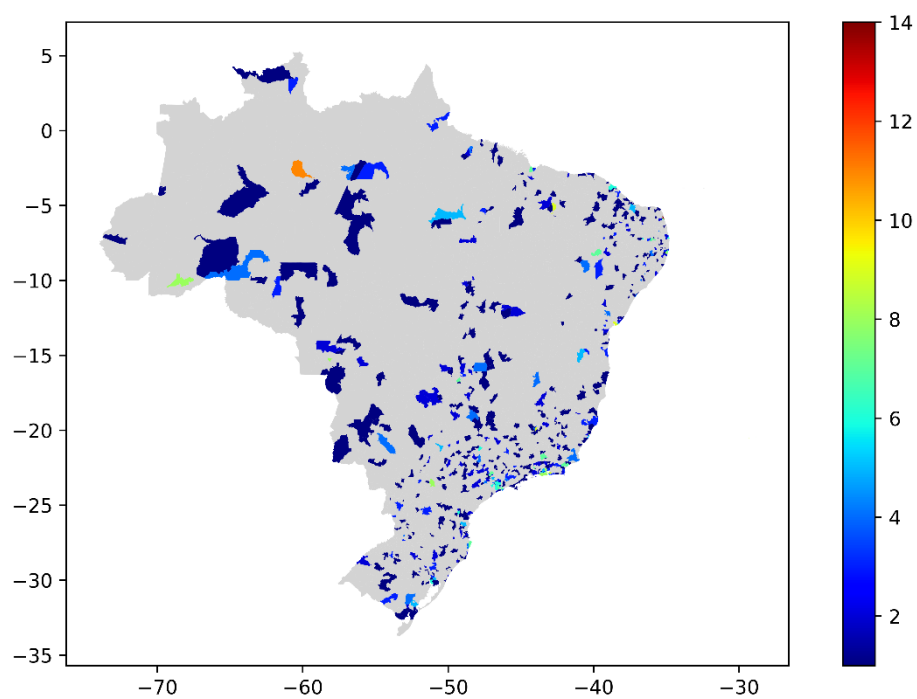

**Figure S5.** Topic 6 distribution on the Brazilian territory.

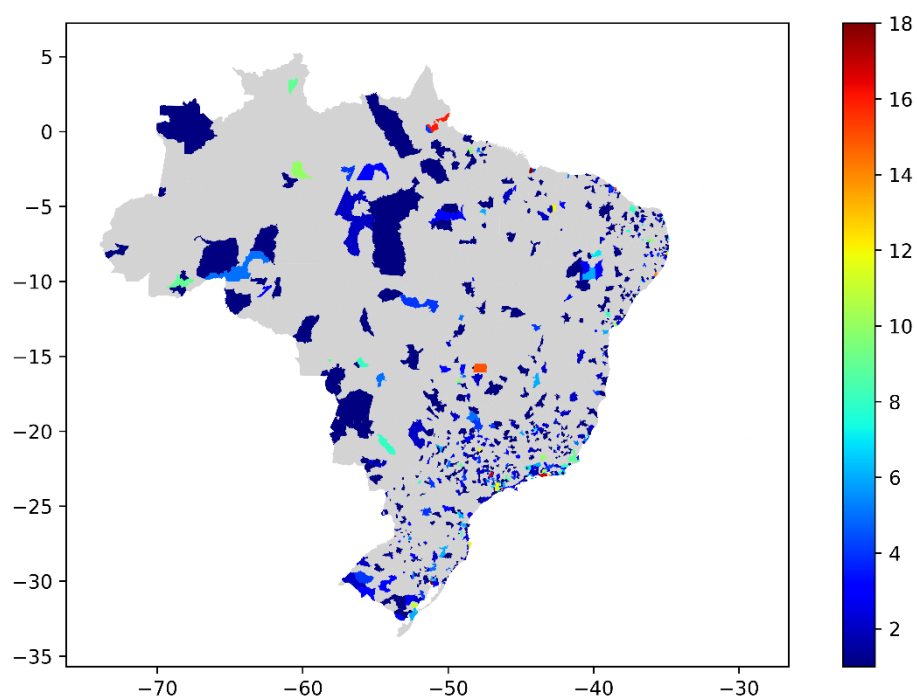

**Figure S6.** Topic 7 distribution on the Brazilian territory.

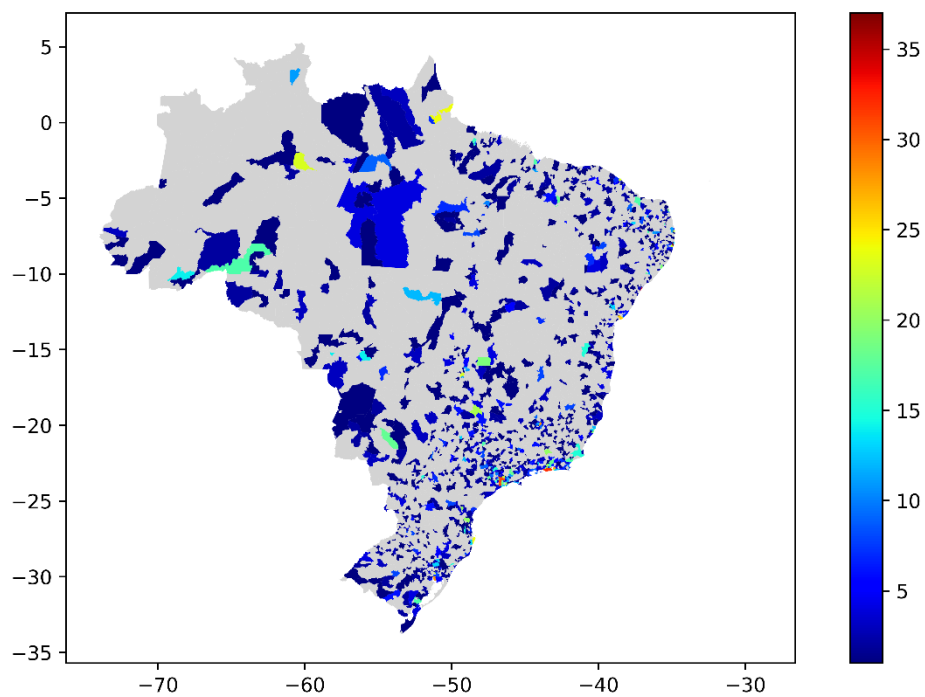

**Figure S7.** Topic 8 distribution on the Brazilian territory.

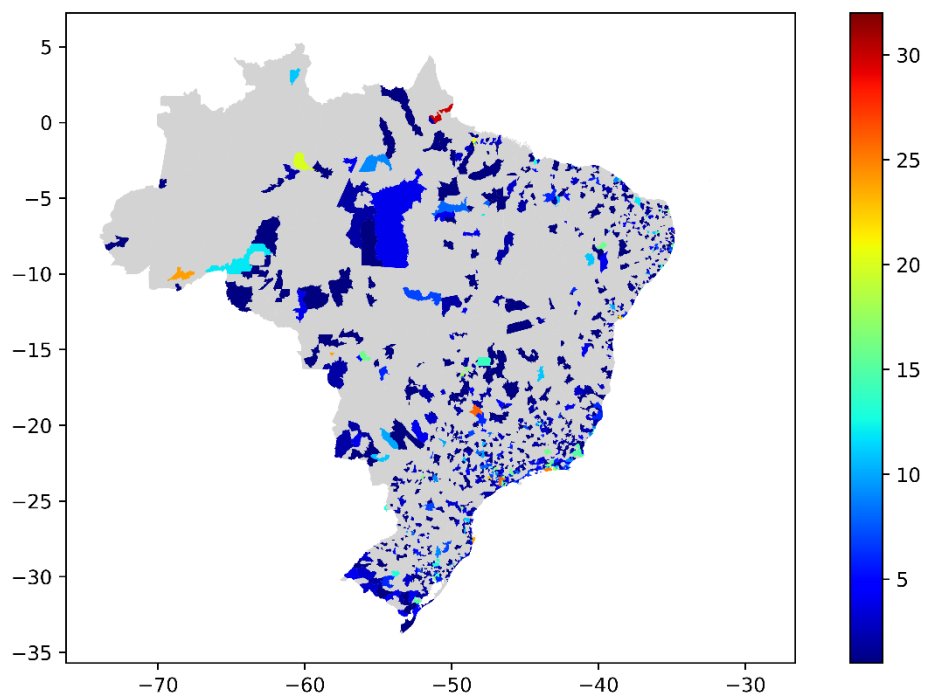

**Figure S8.** Topic 9 distribution on the Brazilian territory.

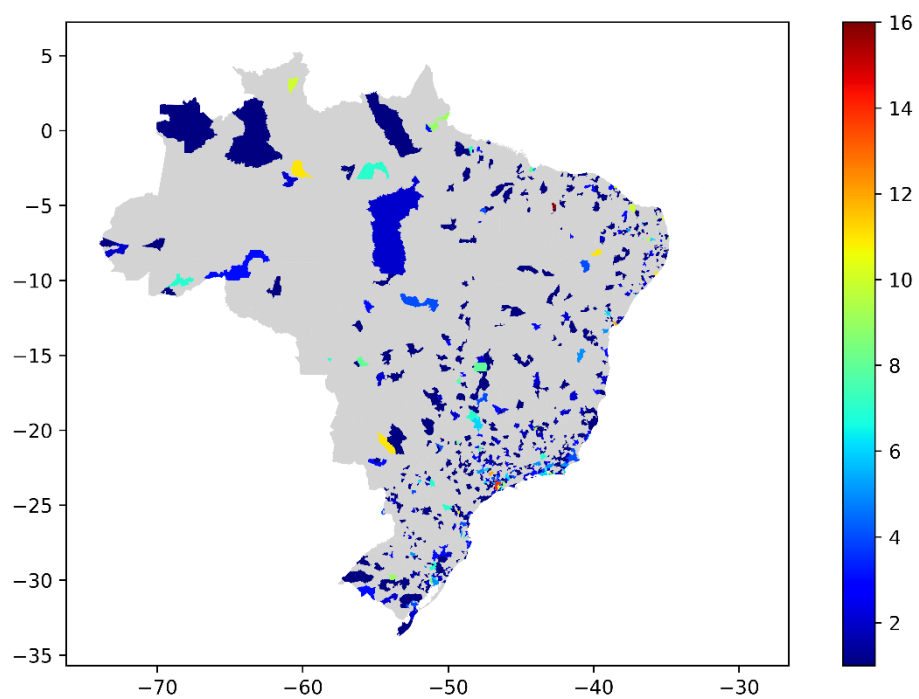

**Figure S9.** Topic 10 distribution on the Brazilian territory.

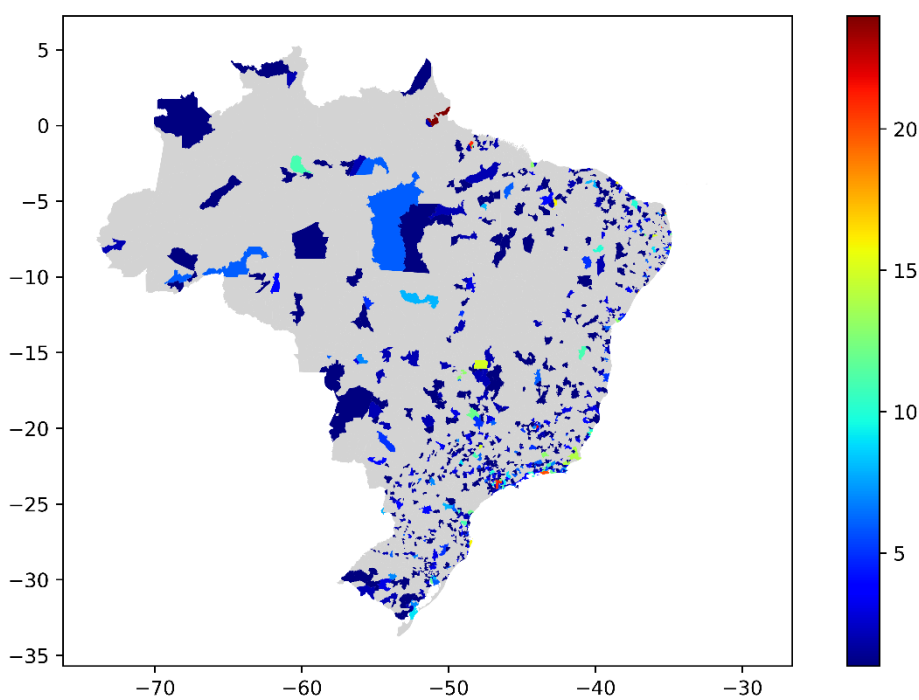

**Figure S10.** Topic 11 distribution on the Brazilian territory.

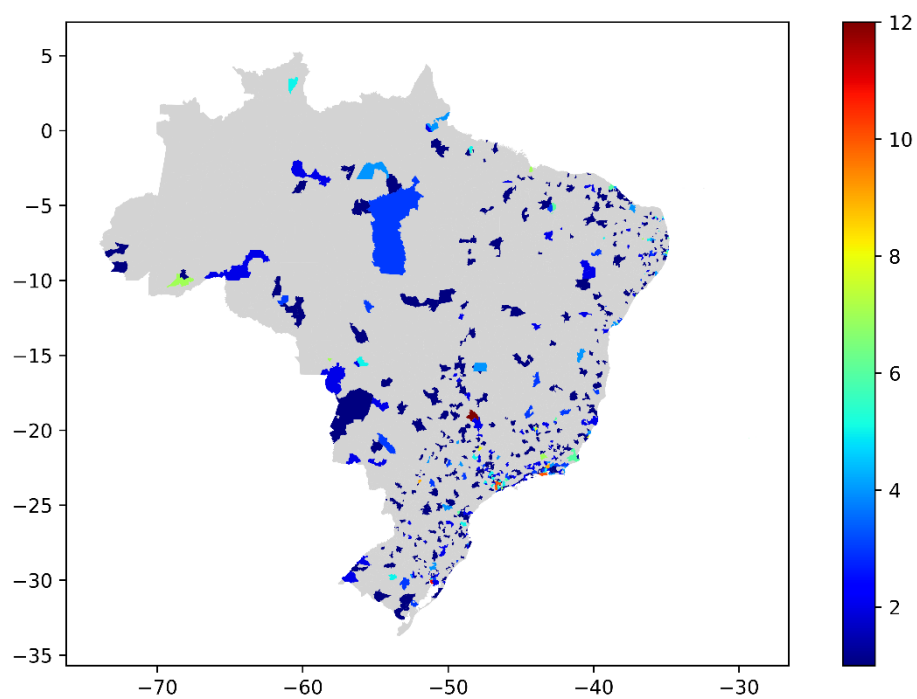

**Figure S11.** Topic 12 distribution on the Brazilian territory.

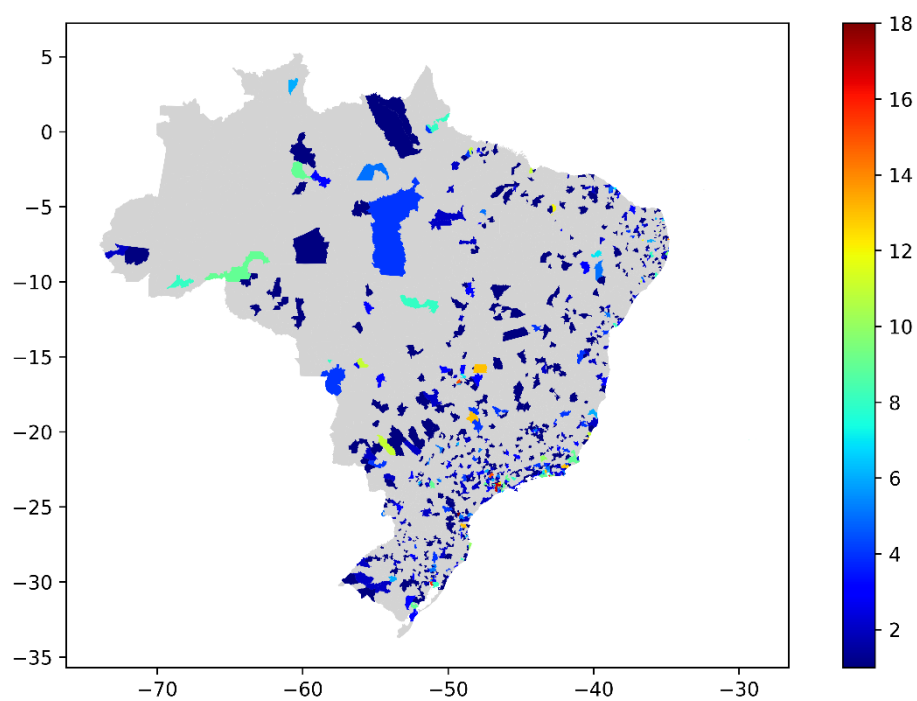

**Figure S12.** Topic 14 distribution on the Brazilian territory.

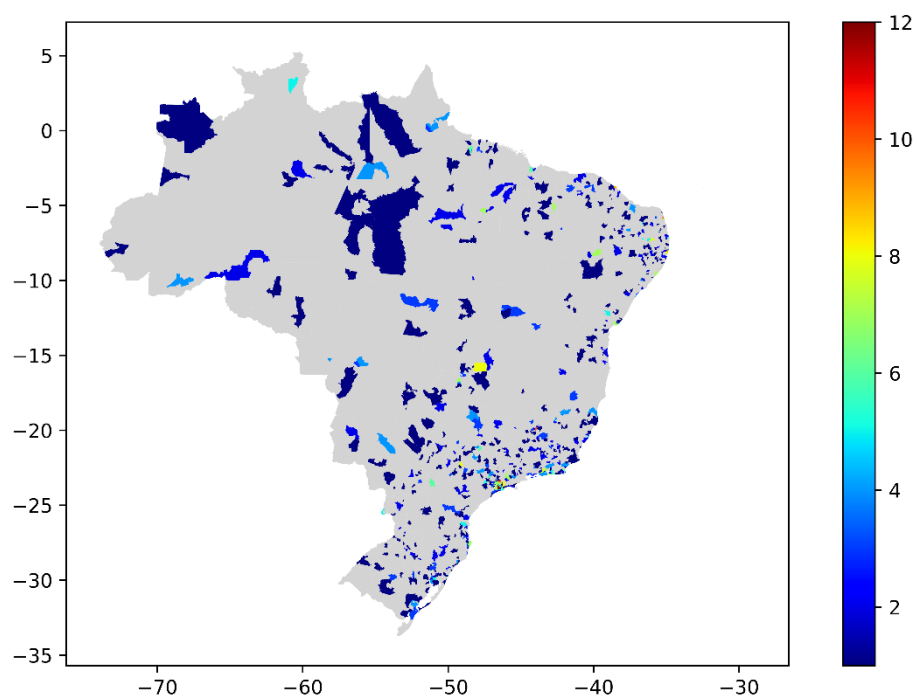

**Figure S13.** Topic 15 distribution on the Brazilian territory.

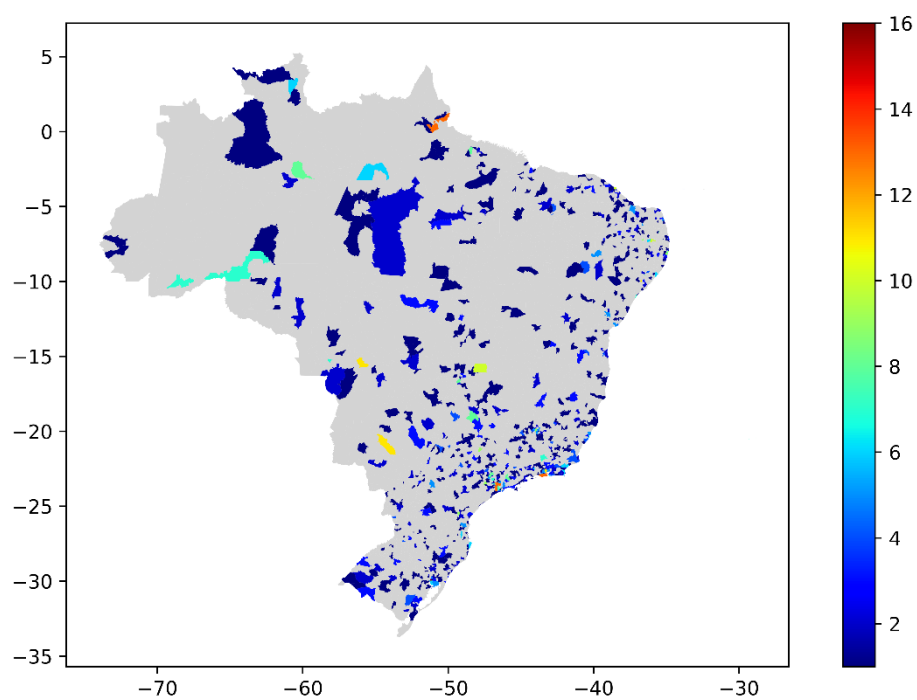

**Figure S14.** Topic 16 distribution on the Brazilian territory.

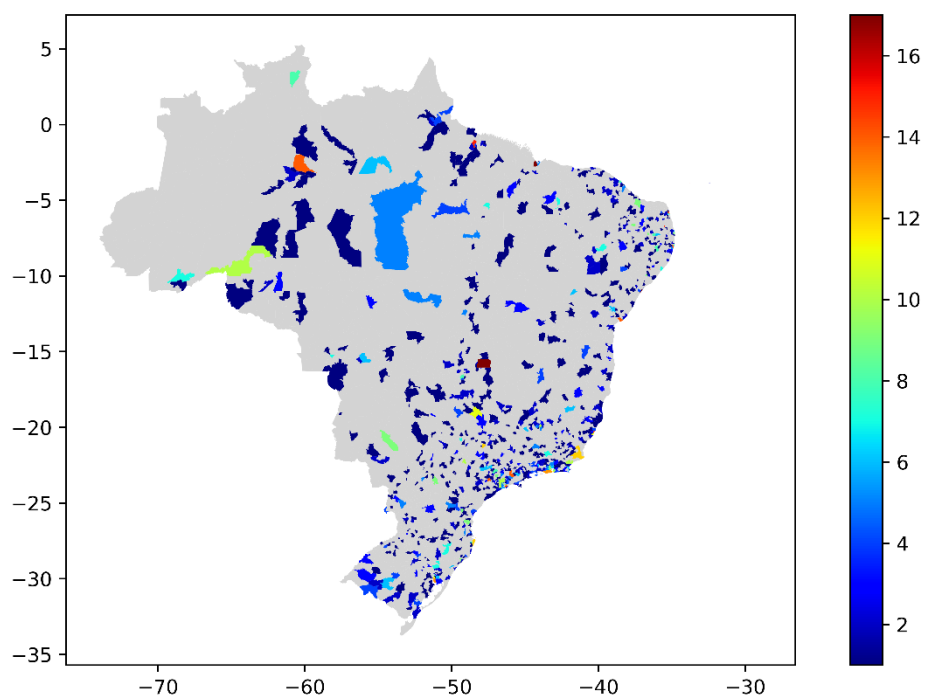

**Figure S15.** Topic 17 distribution on the Brazilian territory.

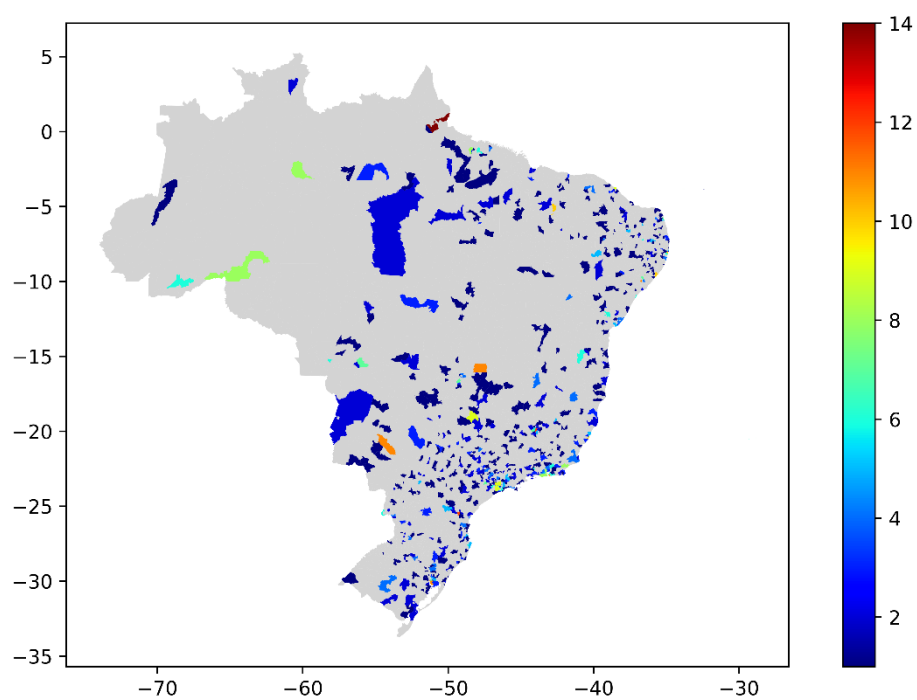

**Figure S16.** Topic 18 distribution on the Brazilian territory.



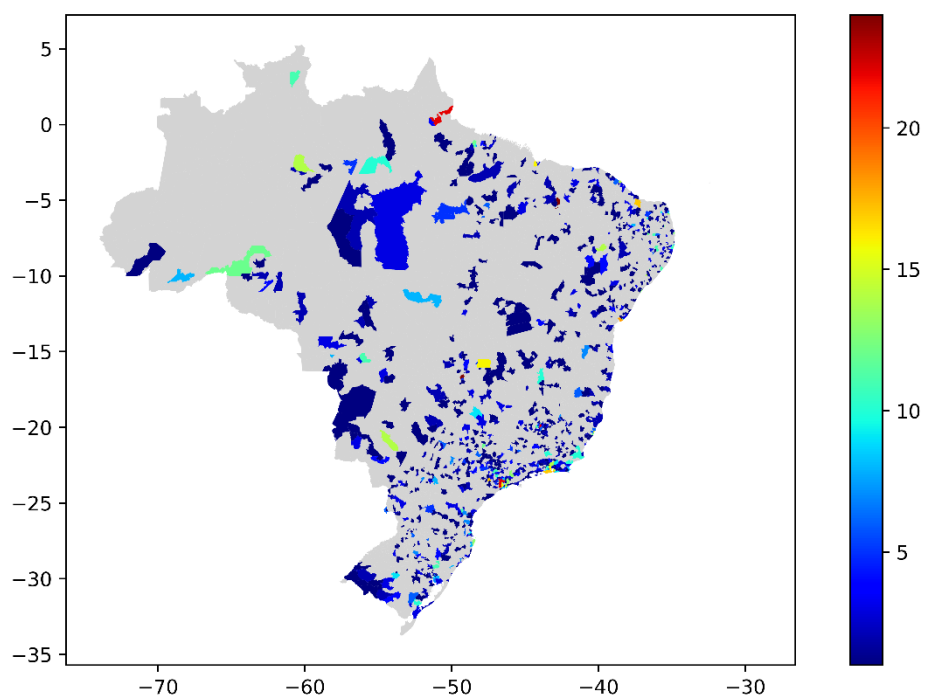

**Figure S17.** Topic 19 distribution on the Brazilian territory.

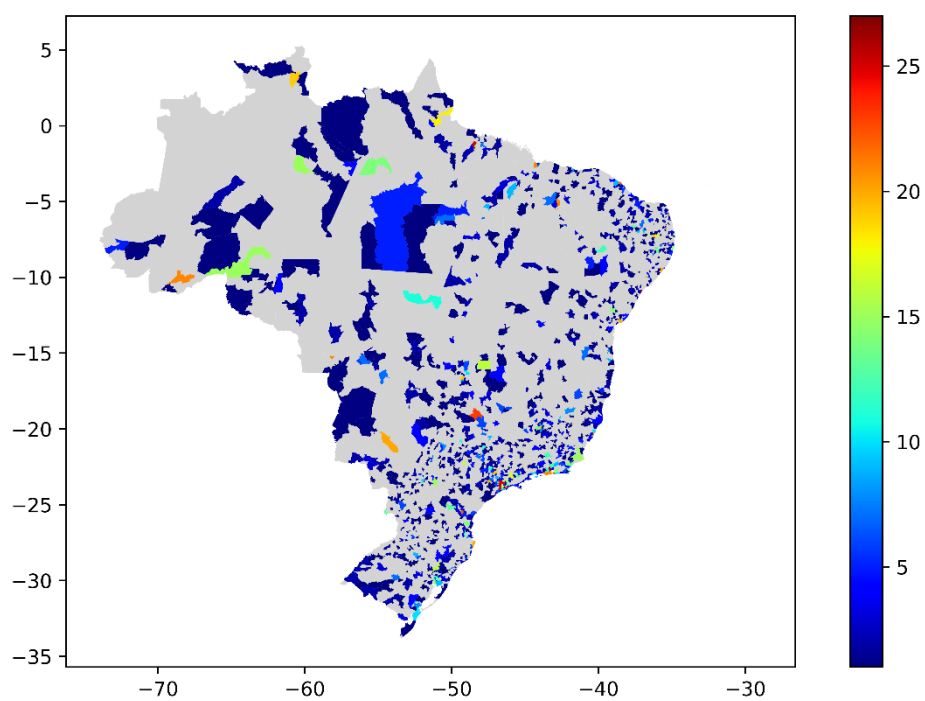

**Figure S18.** Topic 20 distribution on the Brazilian territory.

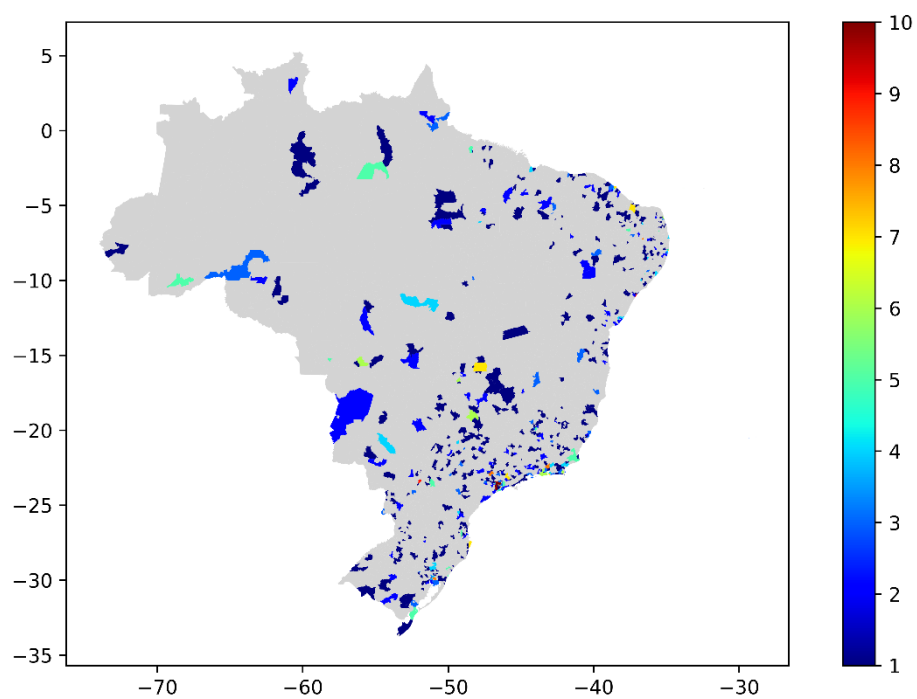

**Figure S19.** Topic 21 distribution on the Brazilian territory.

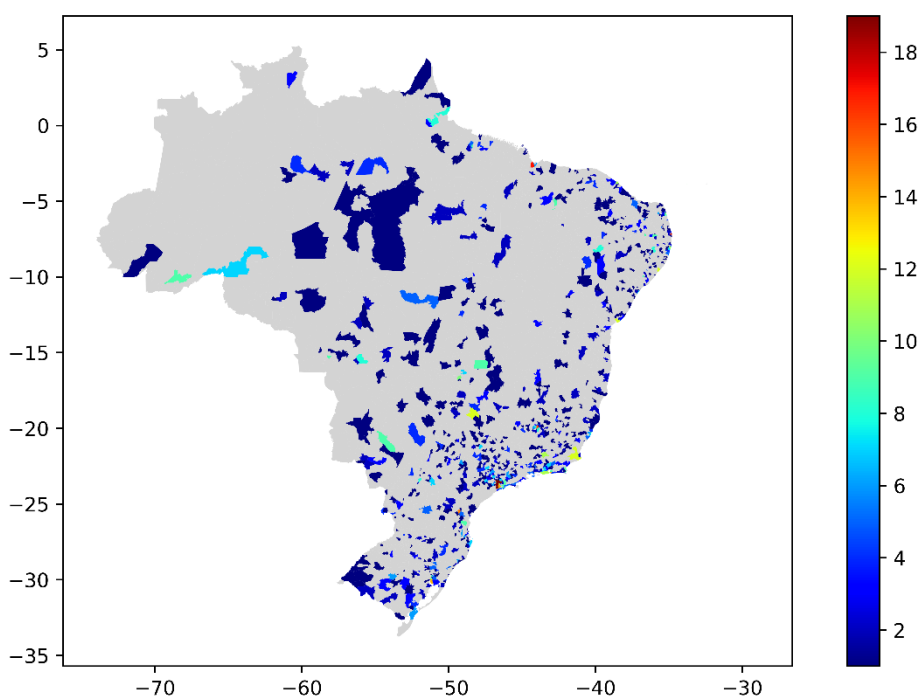

**Figure S20.** Topic 22 distribution on the Brazilian territory.

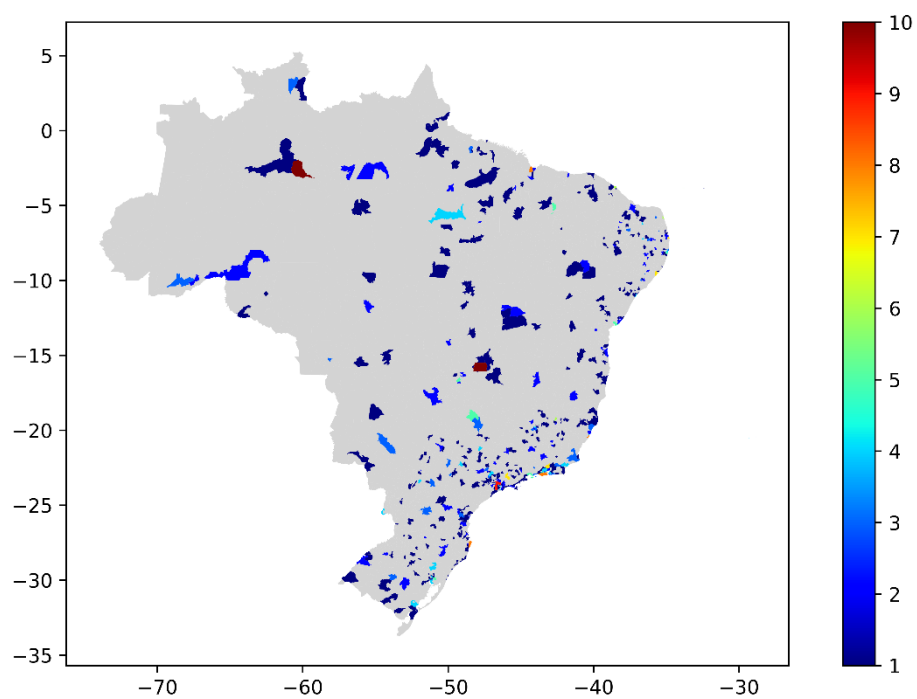

**Figure S21.** Topic 23 distribution on the Brazilian territory.
